# Supplementary material for: Exploratory Study on Screening Chronic Renal Failure Based on Fourier Transform Infrared Spectroscopy and a Support Vector Machine Algorithm
Source: Hindawi journal article supplement (doi:10.1155/2020/7379242), 2020-09-09
Supplement: f1 [file 7379242.f1.docx]

**Supplemental Files**

**Exploratory Study on Screening Chronic Renal Failure Based on Fourier Transform Infrared Spectroscopy and a Support Vector Machine Algorithm**

Yushuai Yuana,1,Li Yangb,1, Rui Gaoa,2, Cheng Chena, Min Lic, Jun Tangd, Xiaoyi Lva,*,

Ziwei Yana,*

a College of Information Science and Engineering, Xinjiang University, Urumqi 830046, China;

b The First Affiliated Hospital of Xinjiang Medical University, Urumqi 830000, China;

c College of Software, Xinjiang University, Urumqi 830046, China;

d Physics and Chemistry Detecting Center, Xinjiang University, Urumqi 830046, China;

1 Contributed equally;

* Corresponding author: Xiaoyi Lv ([xjuwawj01@163.com](mailto:xjuwawj01@163.com)), Ziwei Yan (1936914946@qq.com).


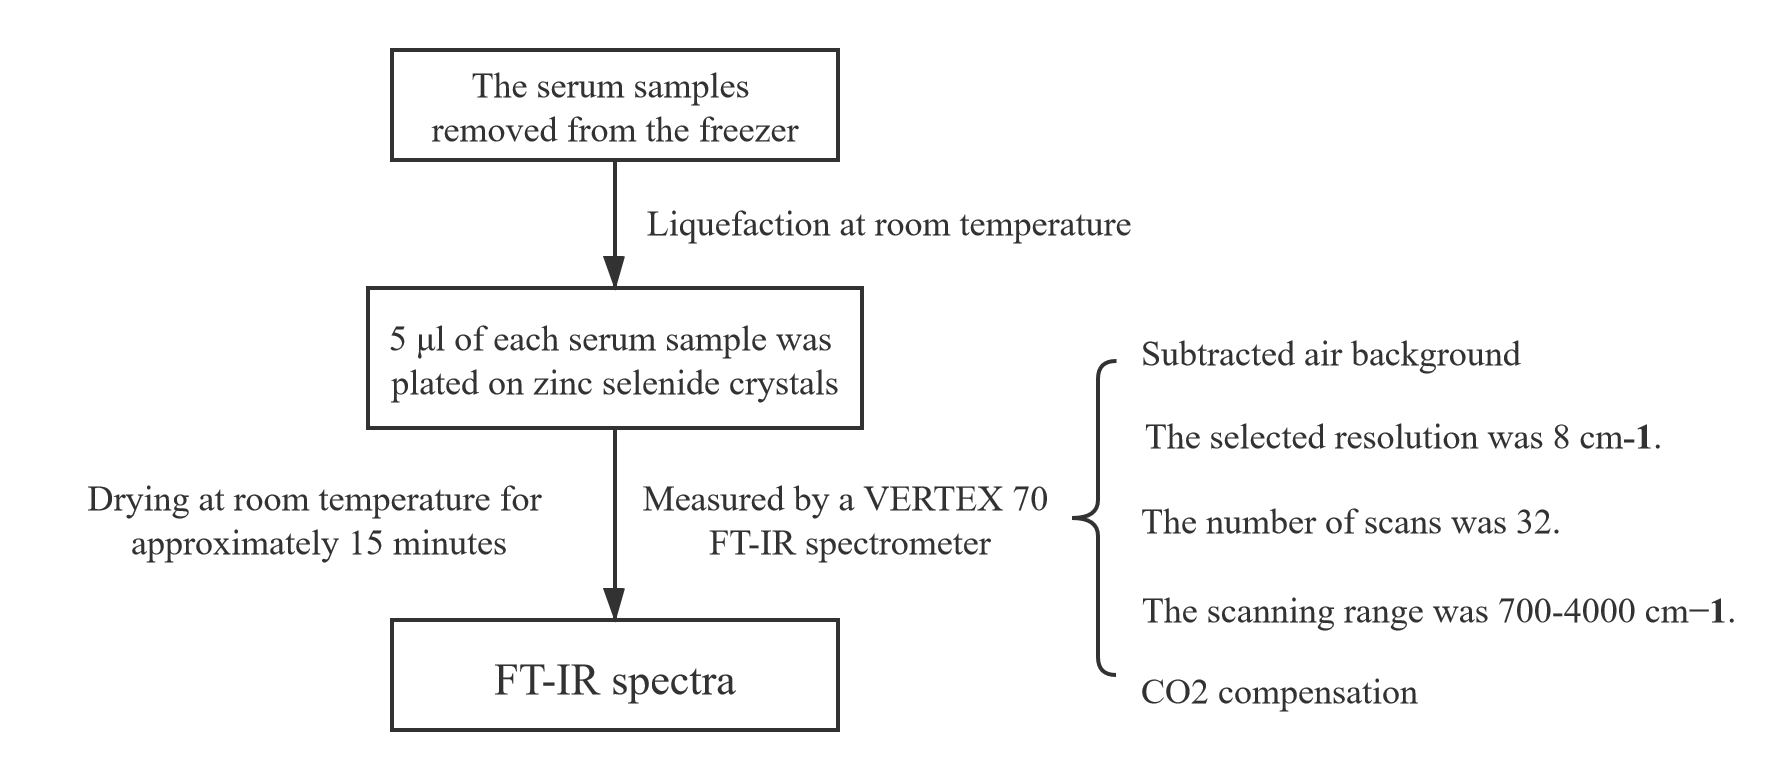


**Figure S1.** The flow chart of measurement of FT-IR Spectra.


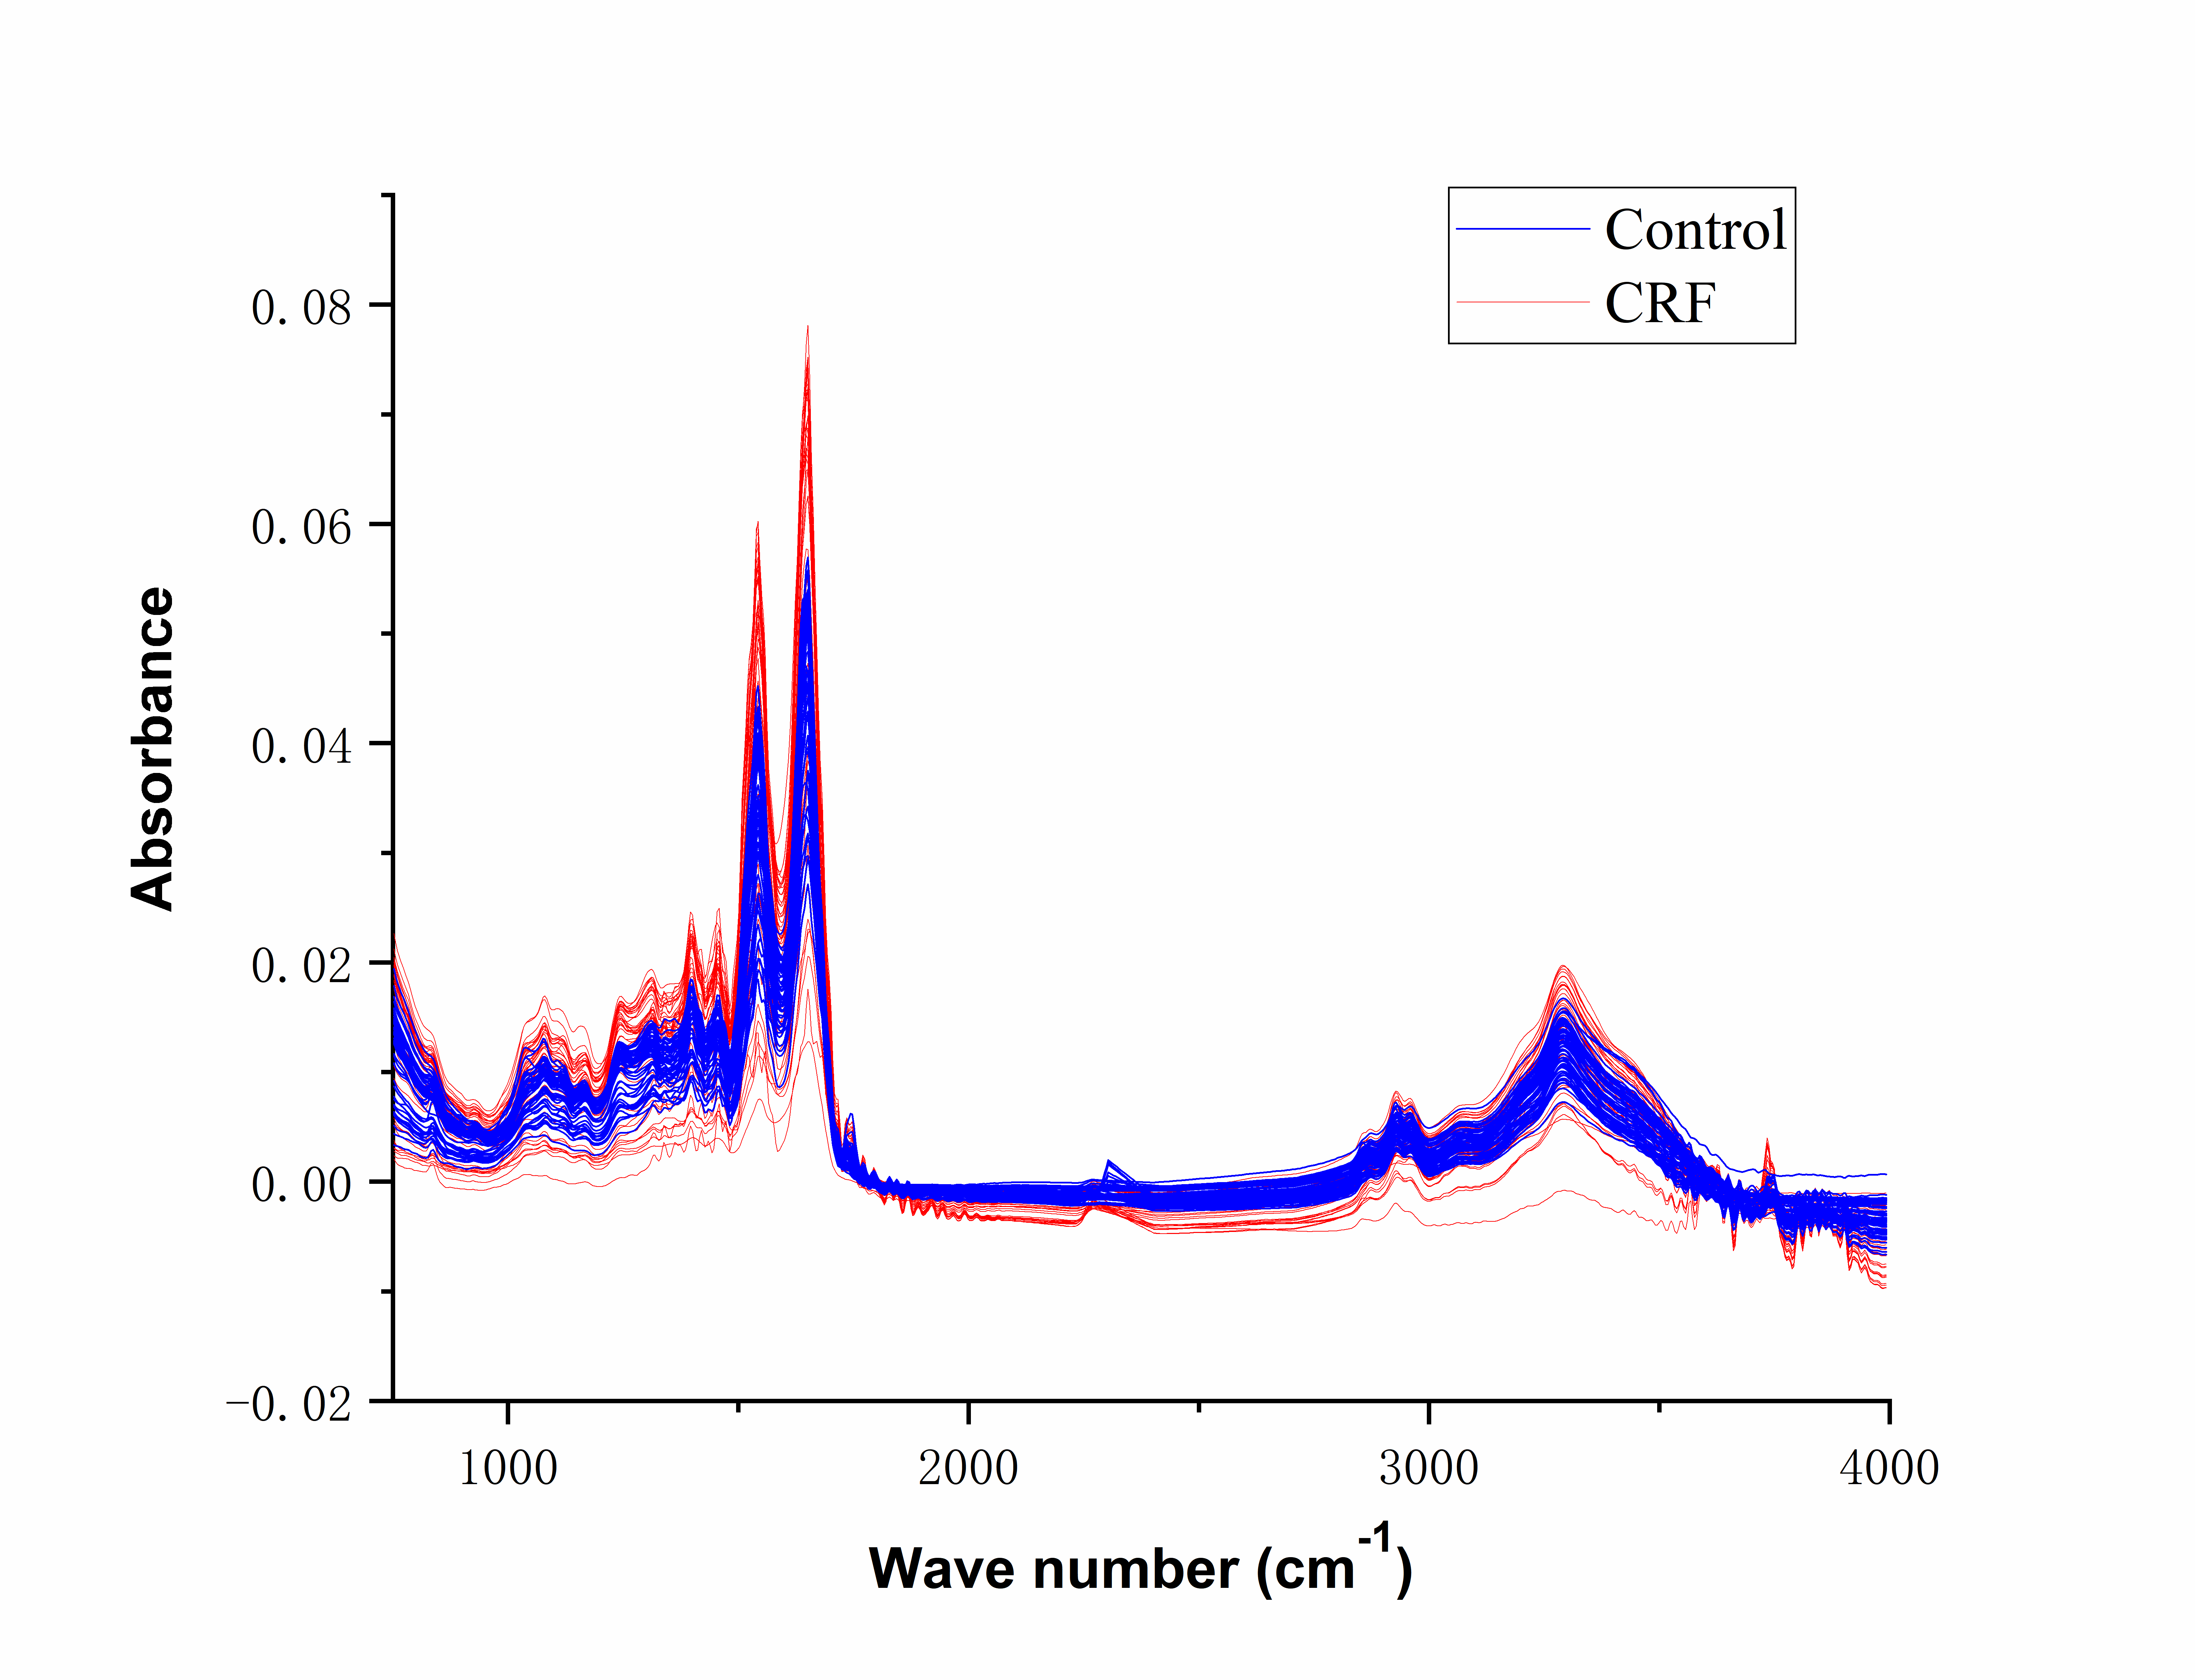


**Figure S2.** Original spectra of 98 samples.


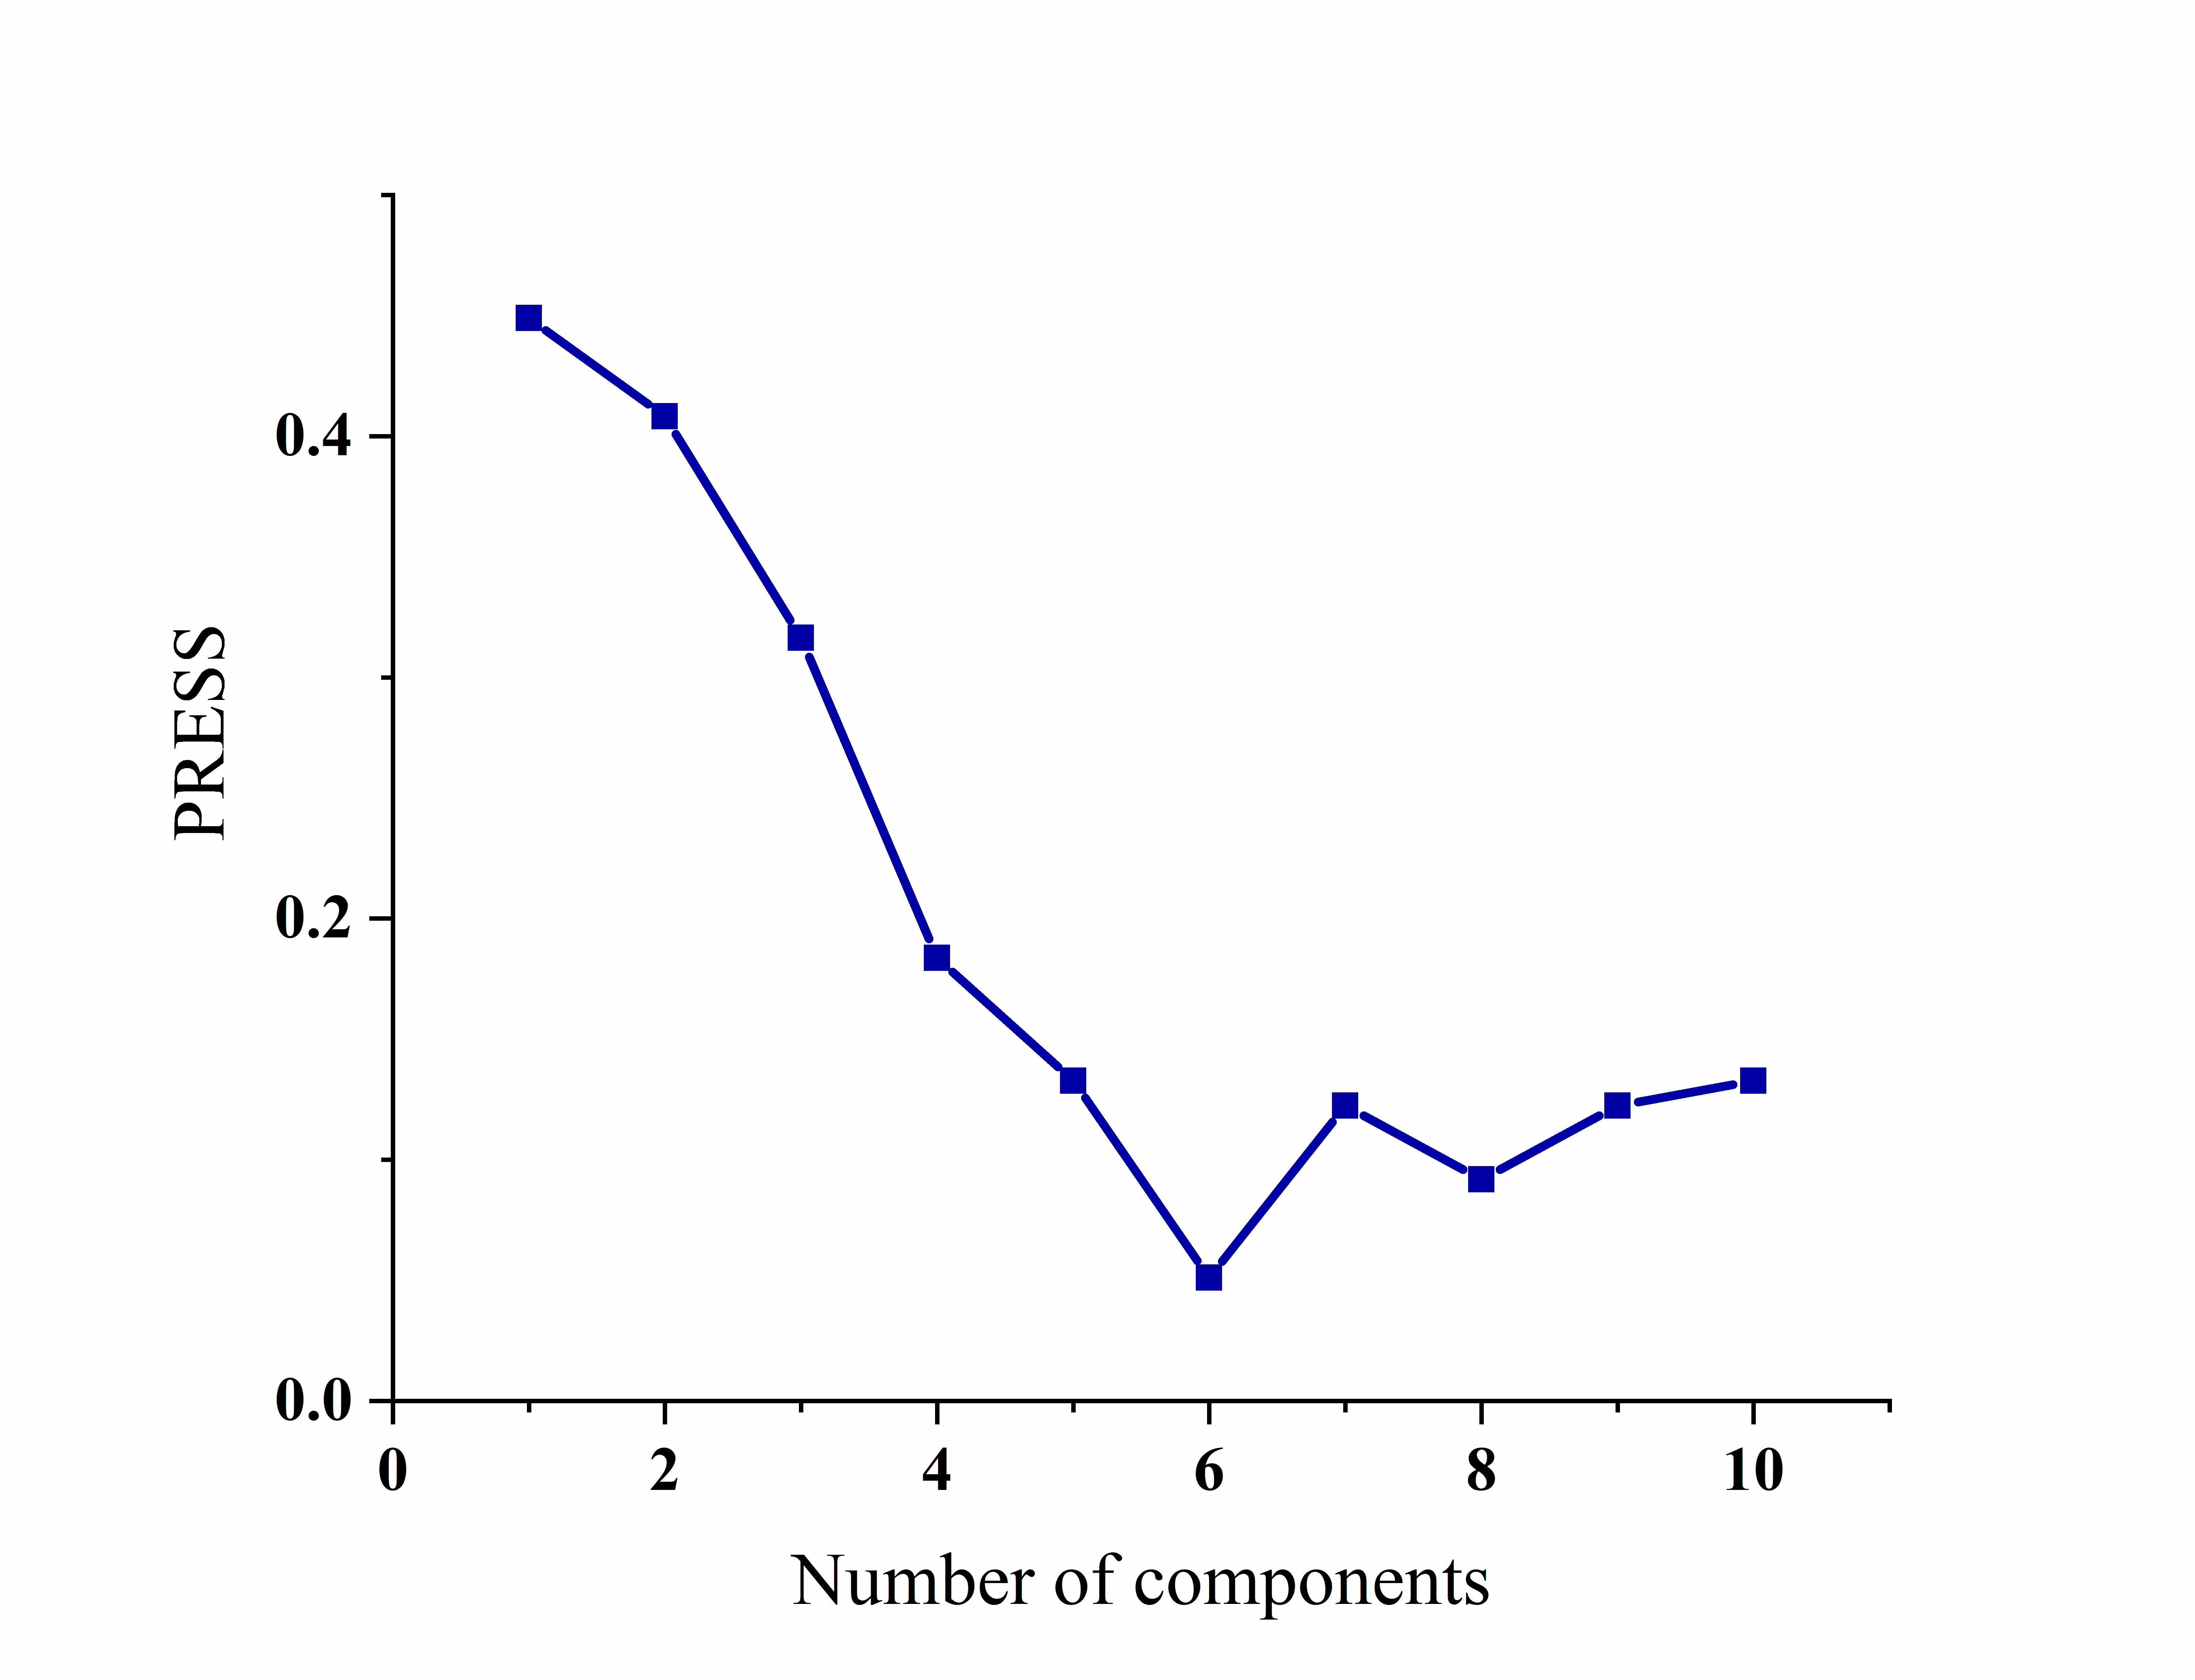


**Figure S3.** Change of PRESS with number of components.
